# Supplementary material for: Unraveling the clonal hierarchy of somatic genomic aberrations
Source: PubMed Central journal article supplement (PMC4167267; doi:10.1186/s13059-014-0439-6), 2014-08-26
Supplement: 13059_2014_439_MOESM1_ESM.pdf [file 13059_2014_439_MOESM1_ESM.pdf]

## 1 Unraveling the clonal hierarchy of somatic genomic aberrations

2 Davide Prandi, Sylvan C Baca, Alessandro Romanel, Christopher E Barbieri, Juan Miguel  
3 Mosquera, Jacqueline Fontugne, Himisha Beltran, Andrea Sboner, Levi A Garraway, Mark A  
4 Rubin, Francesca Demichelis

### 5 6 7 SUPPLEMENTARY TEXT

8  
9 **Filtering structural rearrangements.** CLONET inference engine analyzes the proportion of

10 reads supporting each allele and infers the percentage of cells that harbors the aberrant allele.

11 Informative SNPs fully describe the number of reads of a SCNA, while the number of reads

12 supporting the alternative allele characterizes the clonality of a PM. In case of pair end

13 sequencing protocols, two classes of reads represent a rearranged allele: *overlapping* single

14 end reads that span a breakpoint, and *crossing* pair end reads, where one end maps entirely to

15 one side and the other entirely to the other side of the breakpoint. If we consider that two

16 genomic coordinates  $bp_1$  and  $bp_2$  define a canonical rearrangement, we end up with four pairs

17  $(o_1^{nA}, o_1^A), (c_1^{nA}, c_1^A), (o_2^{nA}, o_2^A), (c_2^{nA}, c_2^A)$ , where  $o$  and  $c$  stand for the number of overlapping and

18 crossing reads, respectively (Figure 2D), and superscripts  $nA$  and  $A$  indicates non-aberrant and

19 aberrant reads. The value of  $o_1^A$  coincides with  $o_2^A$ , as well as  $c_1^A$  with  $c_2^A$ , because in the

20 rearranged allele the position of  $bp_1$  and  $bp_2$  are joint. The ratios of  $o_i^A/(o_i^A + o_i^{nA})$  and

21  $c_i^A/(c_i^A + c_i^{nA})$  are representative of the proportion of reads supporting the rearranged allele and

22 relate to the clonality of the aberration.

23 CLONET adopts strict filters to REARRs analysis. First, the breakpoint  $i$  in  $[1,2]$  with minimum

24 coverage between  $o_1^A$  and  $o_2^A$  is selected to account coverage oscillations. In the attempt to be

25 make conservative calls (minimize the number of clonal REARR called subclonal), this choice

26 assures that the computed clonality will be the maximum among the observed values. Next, the

27 proportions of aberrant and non-aberrant reads from overlapping and from crossing reads are

28 compared using a proportion test between  $o_i^A/(o_i^A + o_i^{nA})$  and  $c_i^A/(c_i^A + c_i^{nA})$  with limit value

29 0.1. CLONET computes the clonality of the Rerr only in case of non-different proportions.

1  
2 **Classification of aberrations.** To ensure robust clonality calls, we defined quality filters  
3 specific for each type of aberration. Only SCNAs with 20 or more informative SNPs with  
4 average sequence coverage of 20x (corresponding to a 5.4% uncertainty around  $\beta$ , Figure 3A)  
5 are considered. For PMs, we require that they are copy number neutral and that they are  
6 supported by at least 2 out of 10 reads. REARRs require special care to account for sequencing  
7 artifact near a breakpoint. Figure 2D describes how pair-end sequencing information is used to  
8 select only high confident copy number neutral REARRs. Finally, to control error propagation  
9 the clonality of an aberration is reported only if its variability range is less than 30% (Figure  
10 S10D).

11 For each somatic aberration, CLONET provides a direct (SCNA) or an indirect (PM,  
12 REARR) estimate of its clonality level and an associated variability range. These values are  
13 proportional to the number of cell cycles since the aberration arose and they allow assessing  
14 the history of tumor evolution. However, oscillations in the coverage, limitations in the sensitivity  
15 of the inference of  $\beta$  (Figure 2A) and error propagation (Figure S10D) require caution in calling  
16 clonality, especially when comparing aberrations across different tumor specimens to build the  
17 tumor evolution path. CLONET manages these factors by discretizing clonality values into four  
18 *clonality classes* (clonal, uncertain.clonal, uncertain.subclonal, and subclonal) in an aberration-  
19 dependent manner. After uncertainty propagation, a triplet  $(Cl_C^{min}, Cl_C, Cl_C^{max})$  describes the  
20 clonality of a SCNA  $C$ , with  $Cl_C$  computed from equations (7) or (8) and  $(Cl_C^{min}, Cl_C^{max})$  being the  
21 minimum and maximum observed clonality after uncertainty propagation. A SCNA present in  
22 less than 80% percentage of tumor cells is subclonal; uncertain is reported depending on  
23 whether or not  $Cl_C^{max}$  cross the threshold. The clonality estimate of a PM  $P$  derives from a single  
24 locus, but its corrected AP may assume three values  $(AP_P^{min}, AP_P, AP_P^{max})$  corresponding to  
25 minimum, called, and maximum *Adm.global*, respectively. The threshold value is computed

1 dynamically as the 95% confidence limit of the expected distribution of the number of reads  
2 supporting alternative base. The same strategy applies to REARRs, with the alternative allele  
3 represented by the re-fished reads around the breakpoints.

4  
5 **Aneuploidy.** Aneuploidy is a pathological condition in which the mean number of alleles per  
6 chromosome differs from the number characteristic of a specific species. Since the number of  
7 reads covering a given genomic position is proportional to the number of alleles, aneuploidy will  
8 affect the mean coverage of a sample. Let's define the Log R of a genomic position  $P$ , as the  
9 logarithm base 2 of the ratio between tumor and normal coverage at  $P$ , normalized by the mean  
10 tumor and normal coverage ratio. Implicitly here we assume that the mean tumor coverage  
11 corresponds to the coverage of a diploid genome and aneuploidy will shift the Log R signal as  
12 observed for metastatic treatment resistant prostate tumor 7520 (Figure S9B and S9D).  
13 Therefore, different ploidy estimations can lead to dramatically different SCNA calls. Figure S5E  
14 shows a melanoma case ME049T from Berger et al [1] originally classified as ploidy equal to  
15 3.05 by ABSOLUTE [2] and equal to 1.93 by CLONET. As a consequence, segments with Log  
16 R value near 0 can be interpreted as 4 (ABSOLUTE) or 2 (CLONET) copies. To improve the  
17 sensitivity, CLONET expands Log R data by adding information on allelic fraction imbalance at  
18 informative SNPs (i.e., Beta) (Figure S5E, bottom) and try to fit observed and expected data.  
19 Mathematical details follow.

20 Let's consider a sample comprising a collection of aberrant and non-aberrant diploid  
21 cells. We define  $cn_A$  and  $cn_B$  as the number of copies of alleles  $A$  and  $B$  in each aberrant cell.  
22 The allelic fraction of an aberrant cell with arbitrary allelic copy numbers  $cn_A$  and  $cn_B$  is  
23 equivalent to the allelic fraction of a population including  $2 * \min(cn_A, cn_B)$  cells with both allele  
24  $A$  and  $B$ , and  $|cn_A - cn_B|$  cells with only one allele (i.e., with a dummy mono-allelic deletion)  
25 (Figure S10B). Therefore, the apparent local admixture is the sum of the percentage of normal

1 cells in the collection (*Adm.global*) plus the percentage of apparent tumor cells with two alleles  
 2 (e.g., in Figure S10B right panel, this correspond to 3/6):

$$Adm.local.apparent = Adm.global + (1 - Adm.global) \frac{2 * \min(cn_A, cn_B)}{2 * \min(cn_A, cn_B) + |cn_A - cn_B|} \quad (1)$$

3 Since we are in case of a (dummy) mono-allelic deletion, we can apply equation (1) and obtain  
 4 the expected apparent percentage of reads from non-aberrant cells

$$\beta.apparent = \frac{2 * Adm.local.apparent}{1 + Adm.local.apparent} \quad (2)$$

5 Interestingly, this value corresponds to the percentage of neutral reads  $\beta$  (Figure S10B). Given  
 6  $cn_A$ ,  $cn_B$ , and the corrected value of  $\beta_{cn}$ , we can also compute the expected Log R for each  
 7 genomic segment. By definition, the total copy number of each aberrant cell ( $cn_{Aber}$ ) is equal to  
 8  $cn_A + cn_B$ . If we assume that the copy number of non-aberrant cells is 2, we can describes the  
 9 observed ratio between the tumor and the normal signal, normalized by the mean tumor and  
 10 normal ploidy, as

$$\log R = \log_2 \frac{\frac{\beta_{cn} * 2 + (1 - \beta_{cn}) * cn_{Ab}}{2}}{\frac{Ploidy}{2}} \quad (3)$$

11 where the numerator is the sum of the admixture ( $\beta_{cn} * 2$ ) and of the aberrant ( $(1 - \beta_{cn}) * cn_{Ab}$ )  
 12 components of the cell collection. The denominator of equation (3) accounts for (possible)  
 13 normalization of the signal.

14 Equations (2) and (3) completely define the  $\beta$  vs Log R space reported in Figure 2c and  
 15 Figure S10C. In principle, we can use the  $\beta$  vs Log R space to find a combination of *Adm.global*  
 16 and *Ploidy* that best fits the observed data, but, for highly heterogeneous samples (subclonality)  
 17 we cannot *a priori* exclude any combination of subclonal copy number signal. However, when  
 18  $cn_A$  is equal to  $cn_B$ ,  $\beta$  is always equal to 1 and it is invariant to both *Adm.global* and *Ploidy*.  
 19 CLONET searches for clusters of  $\beta$  values close to 1 and adjusts Log R values in such a way  
 20 that new values correspond to  $cn_A = cn_B$ , namely 0, 1, 1.58, 2, etc. In case of ambiguity

1 (different local minima of RMSE between adjusted and expected Log R values) the system flags  
2 the sample as unresolved.

3  
4 **PROOFS**

5  
6 **Proof of Equation 3 (Allelic Fraction Distribution)**

7  
8  $P(r = k, 0 \leq k \leq c) =$   
9  $Conv(P(r_{nA} = \beta k), P(r_A = (1 - \beta)k)) =$  (by definition of convolution)  
10  $\sum_{i=0}^c P(r_{nA} = k - i) * P(r_A = i) =$  (as  $P(r_A = i)$  is defined for  $i = 0$  or  $i = (1 - \beta) * c$ )  
11  $P(r_{nA} = k) * (1 - N_{ref}) + P(r_{nA} = k - (1 - \beta)c) * N_{ref} =$   
12  $B(k|\beta c, ps) * (1 - N_{ref}) + B(k - (1 - \beta)c|\beta c, ps) * N_{ref}$

10  
11  
12 **Proof of Equation 1 (Relation between Adm.local and  $\beta$ )**

13  
14 Given a SCNA (aberration)  $C$ , its local DNA admixture is defined as the percentage of non-  
15 aberrant cells over the total number of cells. We overload symbols  $nA$  and  $A$  to indicate both  
16 non-aberrant and aberrant cells and their number when unambiguous. Then we can write the  
17 following

18  
19 
$$Adm.local_C = \frac{nA}{nA + A}$$

20 An unbiased sequencing experiment implies that the number of cells in a specimen is  
21 proportional to the coverage divided by the number of alleles (integer copy number). Therefore,  
22 given a genomic position within  $C$ ,  $nA$  is proportional to the number of non-aberrant reads  $c_{nA}$   
23 divided by the integer copy number  $cn_{nA}$  of non-aberrant cells. The same apply to aberrant cells  
24 where  $c_A$  is the number of aberrant reads and  $cn_A$  is the integer copy number of aberrant cells.  
25 For any arbitrary genomic position in  $C$ , the local admixture is defined as

26  
27 
$$Adm.local_C = \frac{\frac{c_{nA}}{cn_{nA}}}{\frac{c_{nA}}{cn_{nA}} + \frac{c_A}{cn_A}}$$

28 By focusing to informative SNPs and decomposing the coverage as the sum of reference and  
alternative reads, we can write

$$Adm.local_C = \frac{\frac{r_{nA} + a_{nA}}{cn_{nA}}}{\frac{r_{nA} + a_{nA}}{cn_{nA}} + \frac{r_A + a_A}{cn_A}}$$

1  
2 Interestingly, the equation describing the local admixture estimate in an informative SNP  
3 position is similar to the one describing the percentage of non-aberrant reads  $\beta_C$  in C

$$\beta_C = \frac{r_{nA} + a_{nA}}{r_{nA} + a_{nA} + r_A + a_A}$$

5  
6 In the following we will prove that for  $cn_A$  and  $cn_{nA}$  greater than zero there is a precise relation  
7 between  $Adm.local_C$  and  $\beta_C$ .

$$\begin{aligned} Adm.local_C &= \frac{\frac{r_{nA}+a_{nA}}{cn_{nA}}}{\frac{r_{nA}+a_{nA}}{cn_{nA}} + \frac{r_A+a_A}{cn_A}} = \\ &= \frac{\frac{r_{nA}+a_{nA}}{cn_{nA}}}{\frac{cn_A r_{nA} + cn_A a_{nA} + cn_{nA} r_A + cn_{nA} a_A}{cn_{nA} cn_A}} = \\ &= \frac{\frac{cn_A r_{nA} + cn_A a_{nA}}{cn_{nA} cn_A}}{\frac{cn_A r_{nA} + cn_A a_{nA}}{cn_{nA} cn_A}} = \\ &= \frac{cn_A r_{nA} + cn_A a_{nA}}{cn_A r_{nA} + cn_A a_{nA} + cn_{nA} r_A + cn_{nA} a_A} = \\ &= \frac{cn_A r_{nA} + cn_A a_{nA}}{cn_A r_{nA} + cn_A a_{nA} + cn_{nA} r_A + cn_{nA} a_A - cn_{nA} r_{nA} - cn_{nA} a_{nA} + cn_{nA} r_{nA} + cn_{nA} a_{nA}} = \\ &= \frac{cn_A r_{nA} + cn_A a_{nA}}{(cn_A - cn_{nA})(r_{nA} + a_{nA}) + cn_{nA} r_A + cn_{nA} a_A + cn_{nA} r_{nA} + cn_{nA} a_{nA}} = \\ &= \frac{cn_A r_{nA} + cn_A a_{nA}}{(cn_A - cn_{nA})(r_{nA} + a_{nA}) + cn_{nA}(r_A + a_A + r_{nA} + a_{nA})} = \\ &= \frac{\frac{cn_A r_{nA} + cn_A a_{nA}}{r_A + a_A + r_{nA} + a_{nA}}}{(cn_A - cn_{nA}) \frac{r_{nA} + a_{nA}}{r_A + a_A + r_{nA} + a_{nA}} + cn_{nA} \frac{r_A + a_A + r_{nA} + a_{nA}}{r_A + a_A + r_{nA} + a_{nA}}} = \\ &= \frac{cn_A \beta}{(cn_A - cn_{nA})\beta + cn_A} \end{aligned}$$

9

## 10 Proof of Equation 8 (Monoallelic Deletion)

- 1 Let's consider a subclonal bi-allelic deletion where  $n$  (normal),  $m$  (mono-allelic), and  $b$  (bi-allelic)  
 2 denote the proportion of cells with two, one, and zero alleles, respectively ( $n+m+b=1$ ). By  
 3 definition we have

$$1 - Cl_b = \frac{m}{m+b} = \frac{m}{m+1-m-n} = \frac{m}{1-n}$$

- 4 We observe that  $n=Adm.local*(n+m)$  and that  $n=Adm.global$  and therefore

$$m = \frac{Adm.global - Adml.local * Adm.global}{Adm.local}$$

- 5 We can the conclude that

$$1 - Cl_b = \frac{\frac{Adm.global - Adml.local * Adm.global}{Adm.local}}{1 - Adm.global} = \frac{Adm.global - Adml.local * Adm.global}{Adm.local * (1 - Adm.global)}$$

6

7

## 1 SUPPLEMENTARY TABLES AND FIGURES LEGENDS

2 **Supplementary Table S1.** Read count of selected point mutations for MiSeq validation.

3  
4 **Supplementary Table S2.** Pairwise comparison of the percentage of subclonal genomic events  
5 relative to Figure 5C.

6  
7 **Supplementary Table S3.** The table reports the association between the percentage of  
8 subclonal genomic events when samples are partitioned accordingly with patients' clinical  
9 characteristics. The table shows that the clinical characteristics are not able to distinguish  
10 between less and more heterogeneous samples.

11  
12 **Supplementary Figure S1.**

13 Pictorial representation of the method CLONET uses to manage bi-allelic deletions. Three types  
14 of cells are considered: normal cells (yellow) with gene A (dark brown) and gene B (light brown)  
15 present in two copies; tumor cells of type I (light red) harbor a bi-allelic deletion of both genes A  
16 and B; tumor cells of type II (dark red) have zero copies of B and one copy of A. The bottom row  
17 reports the distribution of the expected AF at informative SNPs within gene A and gene B. In  
18 pure diploid cells with two copies of genes A and B, AF is centered in 0.5. In type I tumor cells,  
19 there is no signal, as both alleles are deleted. In type II tumor cells, one allele of gene B is  
20 present and the AF assumes values 0 or 1. In a hypothetical mixture of normal and tumor cells  
21 (right panel), the distribution of AFs along gene A reports only the signal from the DNA  
22 admixture, while the distribution of gene B corresponds to a mono-allelic deletion, reflecting the  
23 fact that cells with a bi-allelic deletion do not contribute to the AF.

24  
25 **Supplementary Figure S2.**

26 **(A-C)** Histogram of the Log R data of all the samples in the prostate, melanoma, and lung  
27 dataset, respectively. The left plot shows data as reported by the segmentation algorithm while  
28 the right plot shows Log R values after ploidy and *Adm.global* correction. Log R correction  
29 improves the quality of the segmentation and simplify the detection of copy number aberrations.

30  
31 **Supplementary Figure S3.**

32 **(A)** Comparison between alternative allele proportions computed from WGS and MiSeq  
33 experiments. Scatterplot of the alternative allelic proportion (AP) on 18 somatic point mutations



1 in prostate samples selected for MiSeq validation. The x axis reports the AP observed on MiSeq  
2 data and the y axis reports the same value computed on WGS data (Supplementary Table S1).  
3 The color of a point corresponds to the clonality assigned by CLONET to the point mutation.  
4 Inset text reports Pearson product-moment correlation coefficient and associated p-value. **(B)**  
5 Allelic fraction (AF) of informative SNPs along the interstitial deletion between *TMPRSS2* and  
6 *ERG* and of an independent control clonal deletion for each sample is reported in Fig. 3A. The  
7 clonality statuses of the Rearrs and of the accompanying interstitial deletions are identical.

8

9 **Supplementary Figure S4.** Experimental in situ validation.

10 **(A)** Low power view of adenocarcinoma Gleason score 3+3=6 in a prostatectomy specimen  
11 representative case of prostate adenocarcinoma with *SPRY2* subclonality (Case STID-3042).  
12 (yellow box) Some areas do not have deletion of *SPRY2* as demonstrated by the presence of  
13 two yellow signals in tumor cells by FISH. (blue box) In contrast, other areas show hemizygous  
14 deletion of *SPRY2* as demonstrated by the presence of only one yellow signal (arrow heads) in  
15 tumor cells by FISH. **(B)** Low power view of prostate adenocarcinoma Gleason score 4+4=8  
16 with tertiary Gleason pattern 5, in a prostatectomy specimen representative case of prostate  
17 adenocarcinoma with *CHD1* subclonality (Case STID 2525). (yellow box) Some areas have  
18 homozygous deletion of *CHD1* as demonstrated by the presence of only two yellow signals  
19 (reference probe) in tumor cells by FISH. (blue box) In contrast, other areas show hemizygous  
20 deletion of *CHD1* as demonstrated by the presence of one red (*CHD1*) and two yellow signals  
21 (reference probe) in tumor cells by FISH. Note the presence of two red and two yellow signals  
22 (normal) in adjacent stromal cells, used as internal control (arrow heads).

23

24 **Supplementary Figure S5.** In silico validation.

25 **(A)** Scatterplot of the *Adm.global* estimates of CLONET (y axis) vs ABSOLUTE (x axis). Each  
26 dot represents a WGS melanoma sample whose color corresponds to the *ploidy* value  
27 estimated by ABSOLUTE. The plot shows that the *ploidy* of a sample does not bias the  
28 estimation. Inset text reports Pearson product-moment correlation coefficient and associated p-  
29 value. **(B)** Scatterplot of the *Adm.global* estimates of CLONET (y axis) vs ABSOLUTE (x axis)  
30 where each dot represents a WGS prostate sample. Inset text reports Pearson product-moment  
31 correlation coefficient and associated p-value. **(C)** Scatterplot of the *Adm.global* estimates of  
32 CLONET (y axis) vs ABSOLUTE (x axis) where each dot represents a WES prostate sample.  
33 Inset text reports Pearson product-moment correlation coefficient and associated p-value.  
34 Ploidy evaluation on the same dataset gives concordant values and found only an aneuploidy

1 sample (case 04-1243L). **(D)** Scatterplot of the *ploidy* estimates of CLONET (y axis) vs  
2 ABSOLUTE (x axis). Each dot represents a WGS melanoma sample whose color corresponds  
3 to the *Adm.global* value estimated by ABSOLUTE. The plot shows that the *Adm.global* of a  
4 sample does not bias the estimation. Inset text reports Pearson product-moment correlation  
5 coefficient and associated p-value. **(E)** A melanoma case (ME049T) classified as having ploidy  
6 equal to 3.05 by ABSOLUTE and equal to 1.93 by CLONET. The histogram (top) shows the Log  
7 R distribution of the segments. Yellow, violet, and orange arrows point to key Log R peaks used  
8 by both CLONET and ABSOLUTE for ploidy estimation. Beta vs Log R plot (bottom) shows the  
9 observed values for each genomic segment in sample ME049T (gray dots) and the expected  
10 position given purity and ploidy estimated by CLONET and ABSOLUTE (blue and green dots,  
11 respectively). Boxes show allele specific copy number values defined by the position in the Beta  
12 vs Log R space.

13

#### 14 **Supplementary Figure S6**

15 **(A)** Summary of aberrations: Genomic Events (GE) characterized in three tumor datasets  
16 generated through whole genome sequencing. **(B)** Histogram of the alternative allelic proportion  
17 after *Adm.global* correction of the copy number neutral somatic point mutations detected in a  
18 cohort of 264 melanoma samples from TCGA. Pie chart indicates the mean numbers of events  
19 classified as clonal (green) or subclonal (blue) across samples. **(C)** Boxplot of the percentage of  
20 clonal genes across GEs and tumor types with respect to the total number of aberrant genes.  
21 Superimposed strip-charts represent per sample data: the size of each dot is proportional to the  
22 number of genes analyzed.

23

24 **Supplementary Figure S7.** Common evolution of cancer gene aberrations across tumor  
25 samples.

26 Pairwise intersection of the tumor evolution paths of prostate, melanoma and lung samples  
27 computed on a panel of 507 cancer genes. Nodes stand for aberrant genes with the color  
28 representing the chromosome and the shape the kind of aberration. Arcs model temporal order  
29 between two aberrations found in at least three samples of the two tumor types considered. The  
30 central semicircle reports the dependencies found in the three tumor types.

31

32 **Supplementary Figure S8.** Comparison of WGS and WES based estimates.

33 **(A)** Scatterplot of the *Adm.global* estimates of CLONET on 15 prostate patients for which both  
34 exome data (y axis) and WGS data (x axis) are available. Inset text reports Pearson product-

1 moment correlation coefficient and associated p-value. **(B)** Scatterplot of the percentage of  
 2 clonality estimated for 23484 genes in 15 prostate samples computed using exome data (y axis)  
 3 and WGS data (x axis). Inset text reports Pearson product-moment correlation coefficient and  
 4 associated p-value.

5

6 **Supplementary Figure S9.** Case of tumor progression.

7 The top part of the figure shows the histograms of the Log R data for a primary prostate sample  
 8 **(A)** and a pelvic mass metastasis **(B)** from the same patient. Upon correction for ploidy and  
 9 global admixture, CLONET identifies gene *AURKA* as copy number neutral in the primary  
 10 sample **(C)** but found a gain of 2 copies in the late metastatic sample **(D)**. The shift in the Log R  
 11 values prior and after CLONET ploidy correction in the metastatic sample indicates an  
 12 aneuploidy genome, as confirmed by FISH analysis that demonstrate four yellow signals  
 13 (reference probe) in tumor cells **(E)**. The probes that were used for FISH assays are as follows:  
 14 red test probe - 3' ERG (BAC RP11-24A11); reference probe - 10q25 (BAC RP11-431P18).

15

16 **Supplementary Figure S10.** CLONET method.

17 **(A)** Schematic overview of the computing steps that lead to the definition of the tumor evolution  
 18 path. **(B)** an example of tumor specimen with 2 non-aberrant cells (yellow) and 3 aberrant cells  
 19 (blue) with a duplicated genomic region (red). The *Adm.global* of this specimen is 2/5 and the  
 20 percentage of aberrant reads is 4/13. Note that these values respect Equation (1). The left  
 21 shows tumor cells that results decomposing the blue aberrant cells into 3 normal cells and 3  
 22 aberrant cells with a mono-allelic deletion (brown). The percentage of neutral reads is 10/13.  
 23 The value of  $\beta$  is rescaled to account for the gain by considering the proportion of aberrant  
 24 reads is three times greater, that is,  $1 - (3 * (1 - \beta))$ . The bottom plot highlights that the AF of the  
 25 tumor specimen and of its decomposition are the same. **(C)** example of the distribution of the  
 26 expected  $\beta$  vs Log R values in a sample with 20% of *Adm.global* and a mean ploidy of 2. Each  
 27 point represents a genomic segment defined by its Log R value, computed by segmentation,  
 28 and its  $\beta$  value, computed by CLONET. In particular, the blue cluster includes segments where  
 29 only one allele is present in the 100% of the tumor cells population (i.e., they are mono-allelic  
 30 clonal deletions). These segments are used to compute the *Adm.global* of the sample. The  
 31 variability range of the *Adm.global* returned by CLONET considers the dispersion of the data in  
 32 this cluster. **(D)** the plot shows how the variability ranges of local and global DNA admixture  
 33 estimates propagate to the clonality values. Each box corresponds to a pair of local and global  
 34 DNA admixture values and illustrates the clonality variability range as a function of their

1 variability ranges. Local and global admixture variability ranges are computed from  $\beta$  uncertainty  
2 table.

### 3 **References**

- 4 1. Berger MF, Hodis E, Heffernan TP, Deribe YL, Lawrence MS, Protopopov A, Ivanova E, Watson  
5 IR, Nickerson E, Ghosh P, et al: **Melanoma genome sequencing reveals frequent PREX2**  
6 **mutations**. *Nature* 2012, **485**:502-506.
- 7 2. Carter SL, Cibulskis K, Helman E, McKenna A, Shen H, Zack T, Laird PW, Onofrio RC, Winckler  
8 W, Weir BA, et al: **Absolute quantification of somatic DNA alterations in human cancer**. *Nat*  
9 *Biotechnol* 2012, **30**:413-421.

10

11
