# Supplementary material for: Unraveling the clonal hierarchy of somatic genomic aberrations
Source: PubMed Central journal article supplement (PMC4167267; doi:10.1186/s13059-014-0439-6), 2014-08-26

# Supplementary Figure 1

Normal Cells

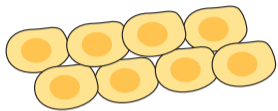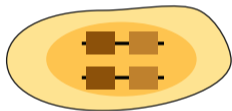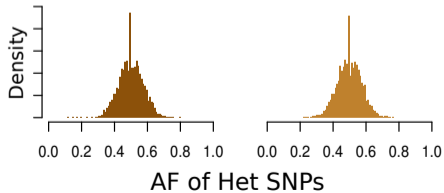

Tumor Cells (type I)

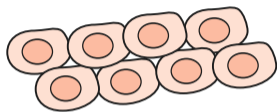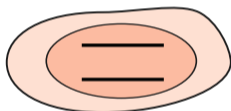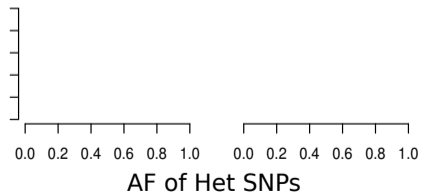

Tumor Cells (type II)

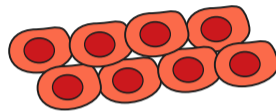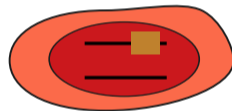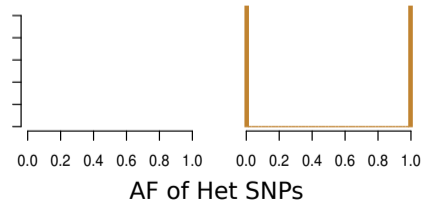

Mixed Cells

DNA admixture: 10%

**gene A** deletion: 100% Clonal

**gene B** deletion: 66% Clonal

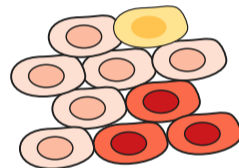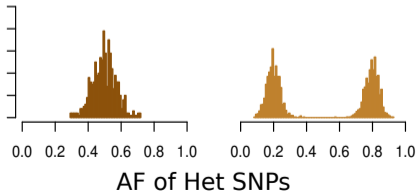

Supplement: 13059_2014_439_MOESM2_ESM.pdf [file 13059_2014_439_MOESM2_ESM.pdf]
