# Supplementary material for: Unraveling the clonal hierarchy of somatic genomic aberrations
Source: PubMed Central journal article supplement (PMC4167267; doi:10.1186/s13059-014-0439-6), 2014-08-26

# Supplementary Figure 2

## A

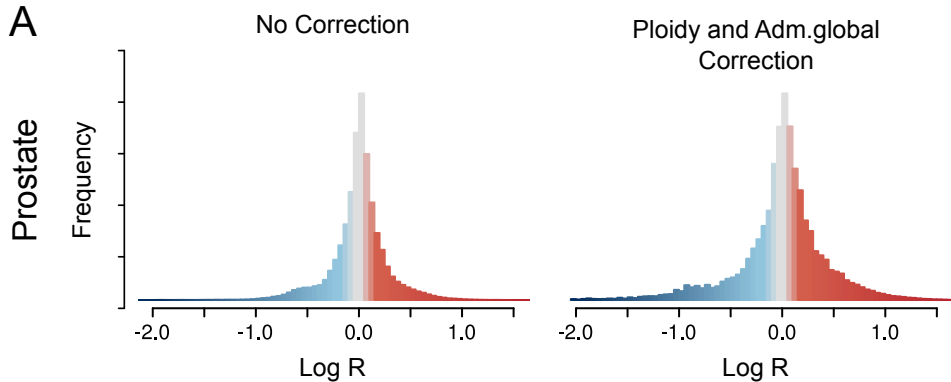

## B

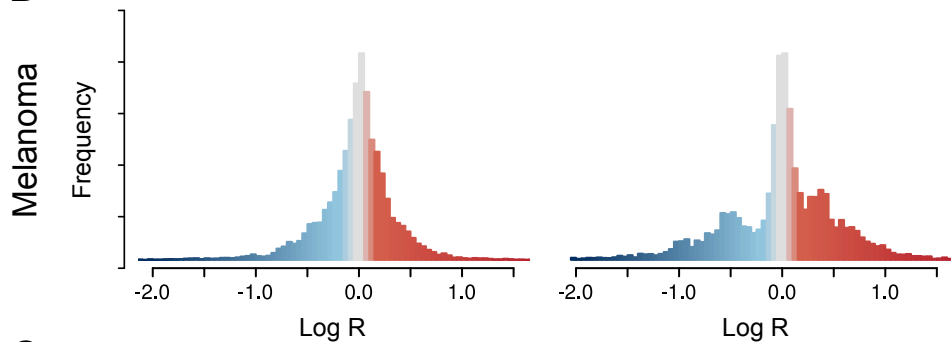

## C

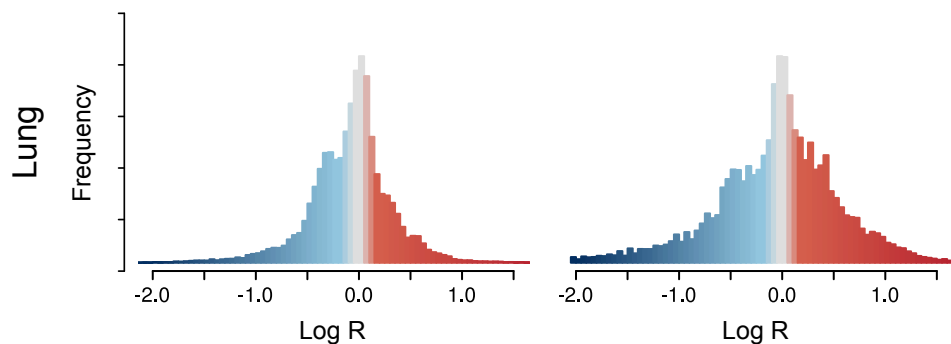

Supplement: 13059_2014_439_MOESM3_ESM.pdf [file 13059_2014_439_MOESM3_ESM.pdf]
