# Supplementary material for: Unraveling the clonal hierarchy of somatic genomic aberrations
Source: PubMed Central journal article supplement (PMC4167267; doi:10.1186/s13059-014-0439-6), 2014-08-26

# Supplementary Figure 8

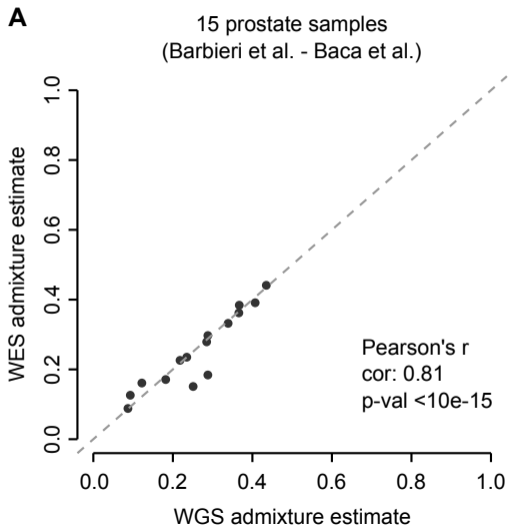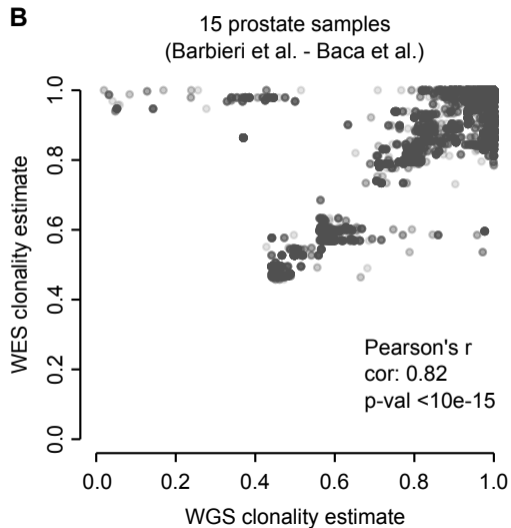

Supplement: 13059_2014_439_MOESM10_ESM.pdf [file 13059_2014_439_MOESM10_ESM.pdf]
